# Supplementary material
Source: publisher site journal article supplement (https://www.dovepress.com/article/355470)
Supplement: Supplementary file 1 [file get_supplementary_file.php]

**Appendix Table 1. Perceived delay in seeking healthcare questions**

| Have you delayed getting care for any of the following reasons in the PAST 12 MONTHS? |
| --- |
| 1. You couldn’t get through on the telephone. |
| 2. You couldn’t get an appointment soon enough. |
| 3. Once you get there, you have to wait too long to see the doctor. |
| 4. The clinic or doctor's office wasn’t open when you could get there. |
| 5. You didn’t have transportation. |
| 6. You have no insurance or ability to pay. |
| 7. It takes too much time to travel to your clinic or doctor's office. |
| 8. You couldn’t afford prescription medicine. |
| 9. You couldn’t afford mental health care or counseling. |

**Appendix Table 2. Latent class cluster analysis model fit parameters**

|  | LL | BIC (LL) | AIC (LL) | Npar | Class.Err. |
| --- | --- | --- | --- | --- | --- |
| 1-Class | -7270 | 14619 | 14567 | 13 | 0.00 |
| 2-Class | -7029 | 14221 | 14113 | 27 | 0.06 |
| 3-Class | -6855 | 13956 | 13792 | 41 | 0.08 |
| 4-Class | -6797 | 13923 | 13703 | 55 | 0.12 |

Abbreviations: AIC=Akaike information criterion; BIC=Bayesian information criterion; LL=log-likelihood; Npar = Number of parameters; Class.Err.=Classification errors.
